# Supplementary material
Source: PubMed Central journal article supplement (PMC5078986)
Supplement: NIHMS823678-supplement-Supplemental_Table_1.pdf [file NIHMS823678-supplement-Supplemental_Table_1.pdf]

**Supplemental Table 1. Sensitivity, Specificity, Positive Predictive Value, and Negative Predictive Value by p16 Status**

| Status of neck disease<br>prior to neck dissection | p16-positive  |     |       | p16-negative  |     |       |
|----------------------------------------------------|---------------|-----|-------|---------------|-----|-------|
|                                                    | Pathologic CR |     |       | Pathologic CR |     |       |
|                                                    | No            | Yes | Total | No            | Yes | Total |
| Present                                            | 8             | 30  | 38    | 6             | 7   | 13    |
| Absent                                             | 1             | 17  | 18    | 4             | 4   | 8     |
| Total                                              | 9             | 47  | 56    | 10            | 11  | 21    |
| Sensitivity                                        | 88.9%         |     |       | 60.0%         |     |       |
| Specificity                                        | 36.2%         |     |       | 36.4%         |     |       |
| Positive predictive value                          | 21.1%         |     |       | 46.2%         |     |       |
| Negative predictive value                          | 94.4%         |     |       | 50.0%         |     |       |

CR = complete response.

Status of neck disease prior to neck dissection is unknown for 13 patients with p16-positive tumors, of whom 7 had a pathologic CR and 6 did not.

Status of neck disease prior to neck dissection is unknown for 9 patients with p16-negative tumors, of whom 5 had a pathologic CR and 4 did not.
